# Supplementary material for: Bio-reduction mechanism of V(V) by thermophilic hydrogen-producing bacteria under acidic conditions
Source: Royal Society of Chemistry journal article supplement (doi:10.1039/d1ew00355k), 2021-01-01
Supplement: d1ew00355k1.pdf [file d1ew00355k1.pdf]

## Supporting information

### Bio-reduction of V(V) and the interaction mechanism by thermophilic hydrogen-producing bacteria

*Xin Zheng*<sup>a,1</sup>, *Bo Zhao*<sup>a,1</sup>, *Chunguang Liu*<sup>a, b,\*</sup>

<sup>a</sup> *School of Environmental Science and Engineering, China–America CRC for  
Environment & Health of Shandong Province, Shandong University, 72# Jimo Binhai  
Road, Qingdao, Shandong 266237, P.R. China*

<sup>b</sup> *Guangdong Provincial Key Laboratory of Environmental Protection and Resources  
Utilization*

---

\*Corresponding author: Tel: +86 150541873869, Fax.: +86053188364868

E-mail address: chunguangliu2013@sdu.edu.cn

1 These two authors contributed equally to this work.

---

Fig.S1. Bio-reduction of V(V) by thermophilic hydrogen-producing bacteria with glucose (A) as substrate, respectively (Initial pH = 5.8, T=55 °C, 10 g/l glucose, V(V) 50 mg/l).

Fig.S2. Three-dimensional excitation-emission-matrix profiles and synchronous fluorescence spectra ( $\Delta\lambda = 15$  nm and  $\Delta\lambda = 60$  nm) of EPSs in the acetic acid-based hydrogen fermenter. Condition: Initial pH = 5.8, T=55 °C, 10 g/l acetic acid.

Table.S1 Alpha-diversity of microbial communities in inoculated sludge and fermenters (V(V)=100 mg/l).

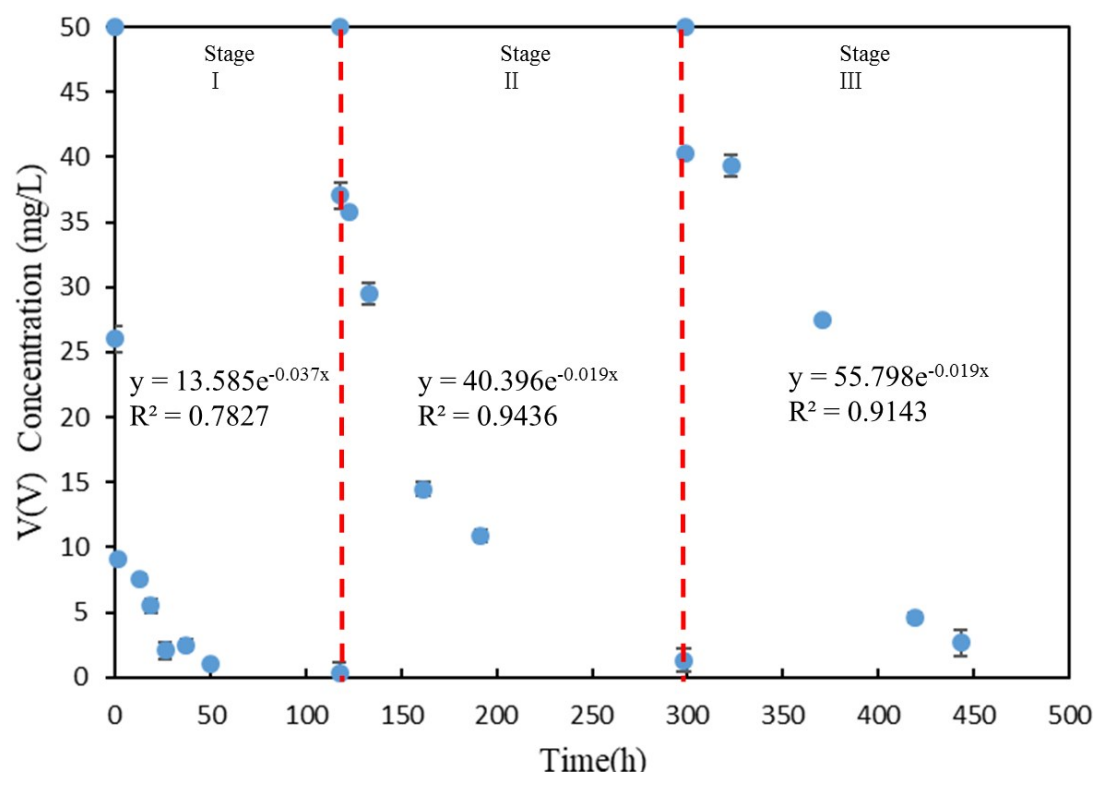

Fig. S1.

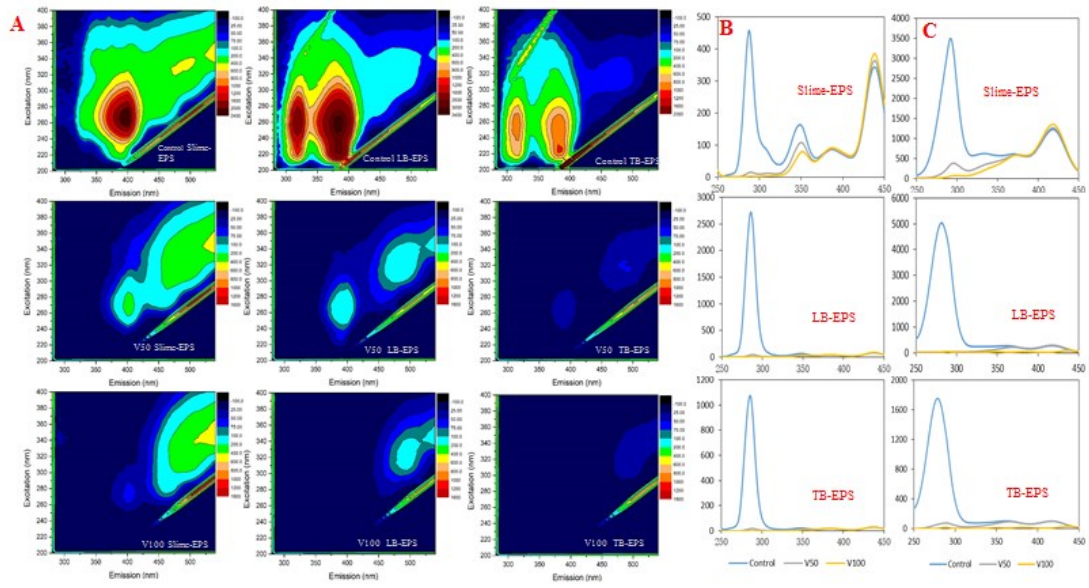

Fig. S2.

---

Table.S1

---

|         | Chao1  | goods_coverage | observed_species | PD_whole_tree | shannon |
|---------|--------|----------------|------------------|---------------|---------|
| Control | 220.84 | 0.999          | 215              | 24.063        | 3.959   |
| V       | 209.52 | 0.998          | 190              | 21.255        | 3.091   |

---
